# Supplementary material
Source: Springer Nature journal article supplement (https://www.springermedizin.de/resource/supplementary/13058_2005_1339_MOESM1_ESM.pdf/9698888)

# Disease Free Survival (HER2 IHC)

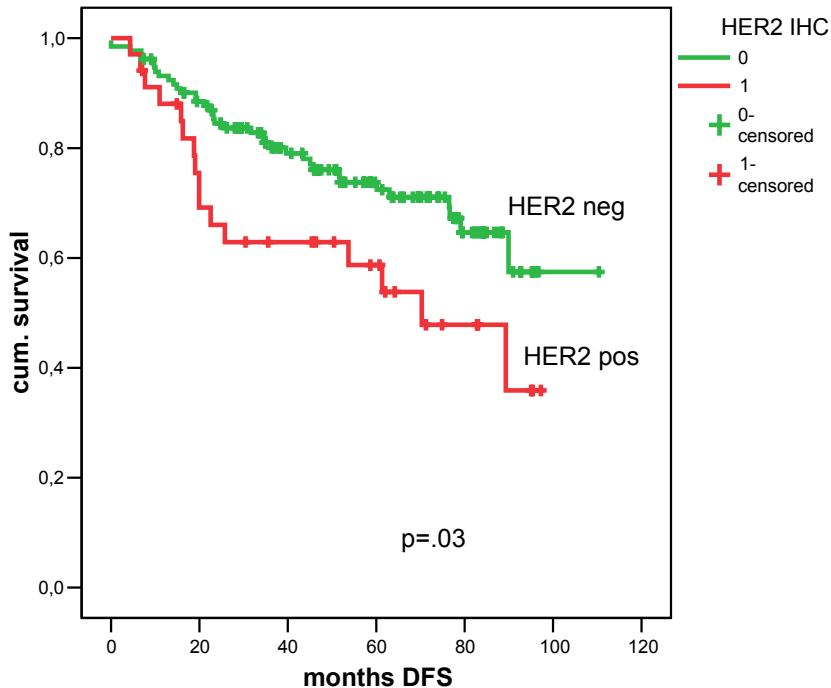

Supplement: MOESM1 [file 9698888]
